# Supplementary material
Source: Royal Society of Chemistry journal article supplement (doi:10.1039/d5cy01343g)
Supplement: d5cy01343g1.pdf [file d5cy01343g1.pdf]

## Supporting Information

### 1. Nitrogen adsorption isotherms

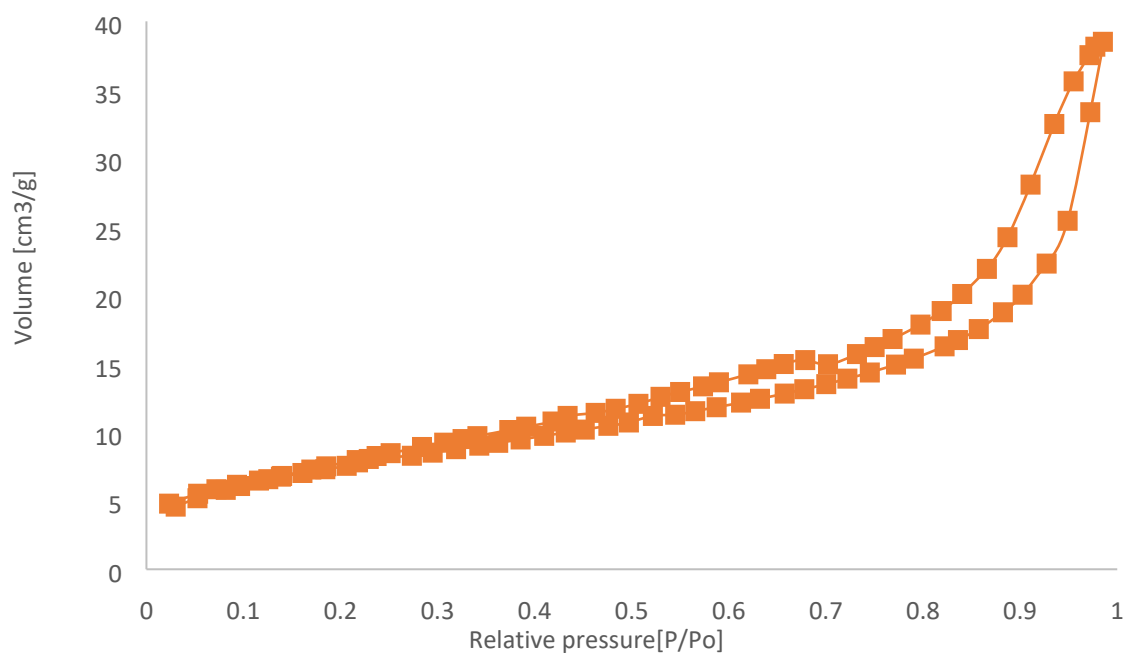

**Figure S1.** Nitrogen adsorption isotherm at -196.15 °C for sample Nb+N-ie.

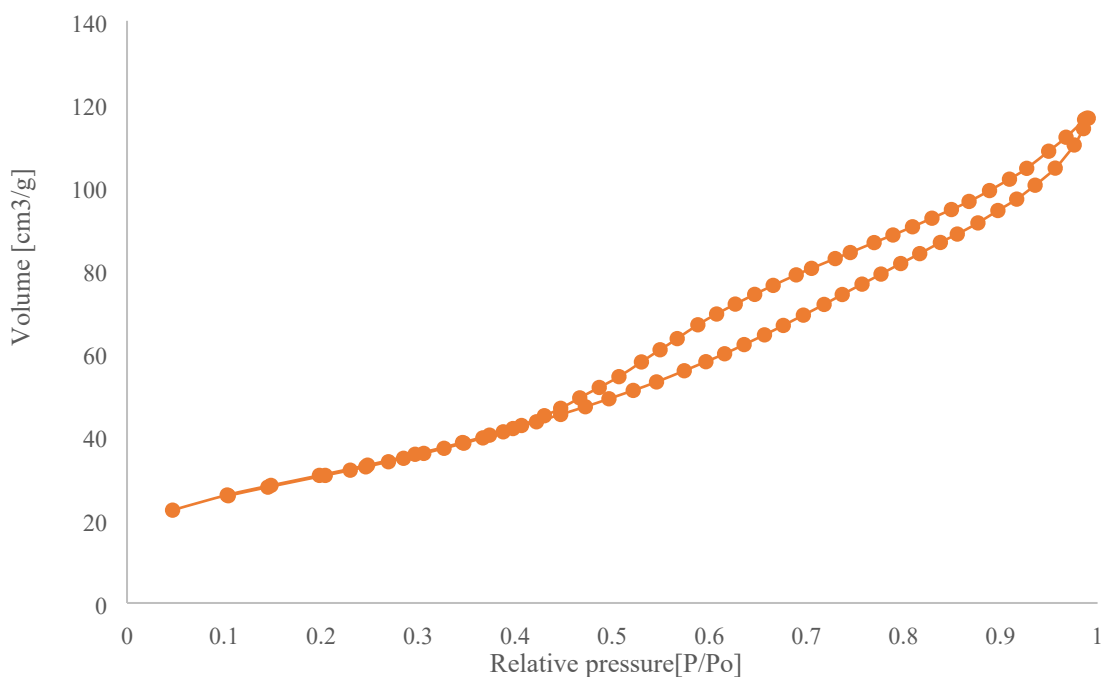

**Figure S2.** Nitrogen adsorption isotherm at -196.15 °C for sample Zr+N-ie.

## 2. Conversion of levulinic acid in the esterification with ethanol catalyzed by zirconia

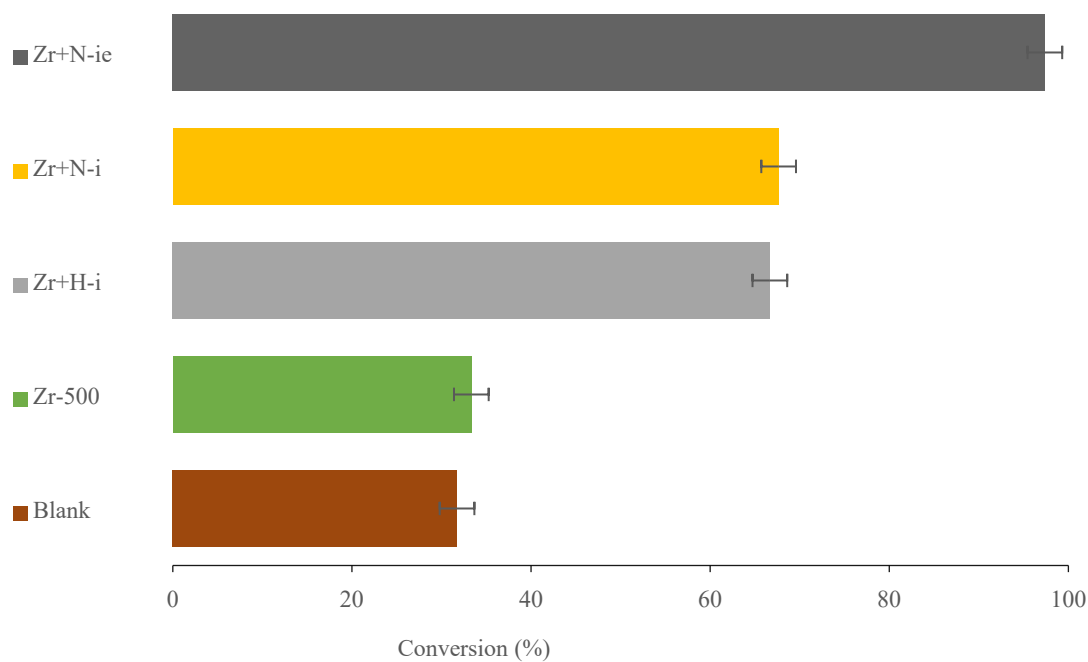

**Figure S3.** Conversion of LAc in the esterification with ethanol for the zirconia catalysts studied. Reaction conditions: 700 rpm, alcohol/acid molar ratio 12:1, 5 wt% catalyst relative to levulinic acid mass, for 2 hours at 140 °C.

## 3. Chromatographic analysis of reactants and products

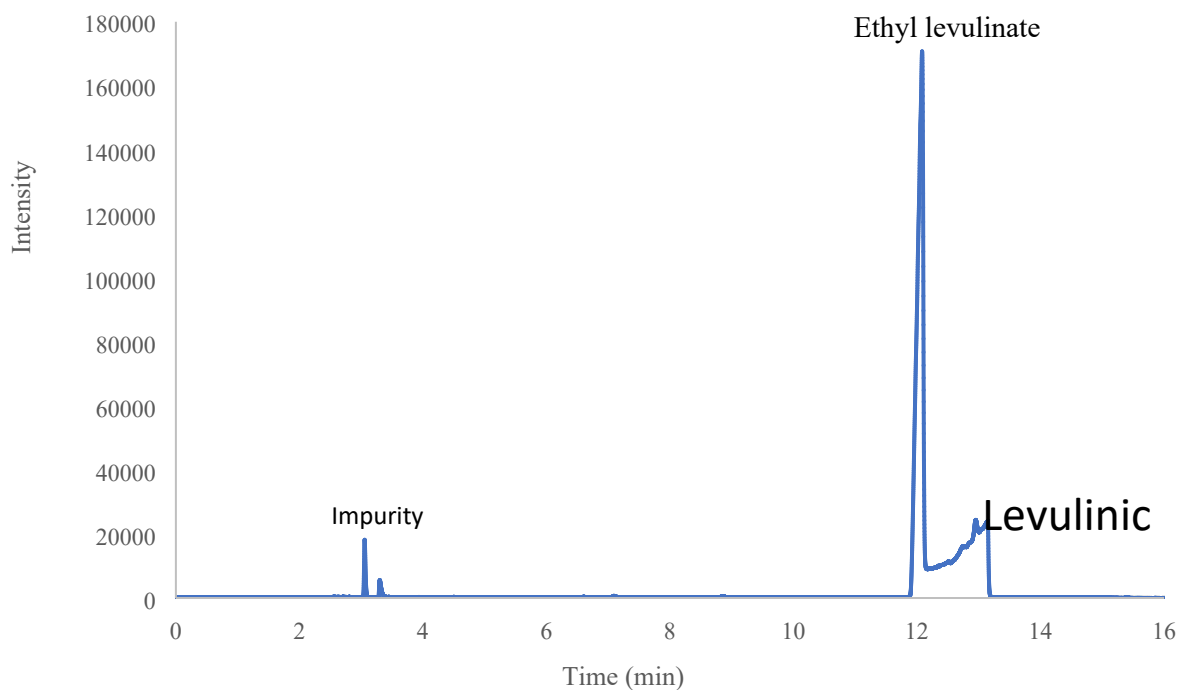

**Figure S4.** Chromatogram of the reaction product at 140 °C catalyzed with Nb+N-ie.

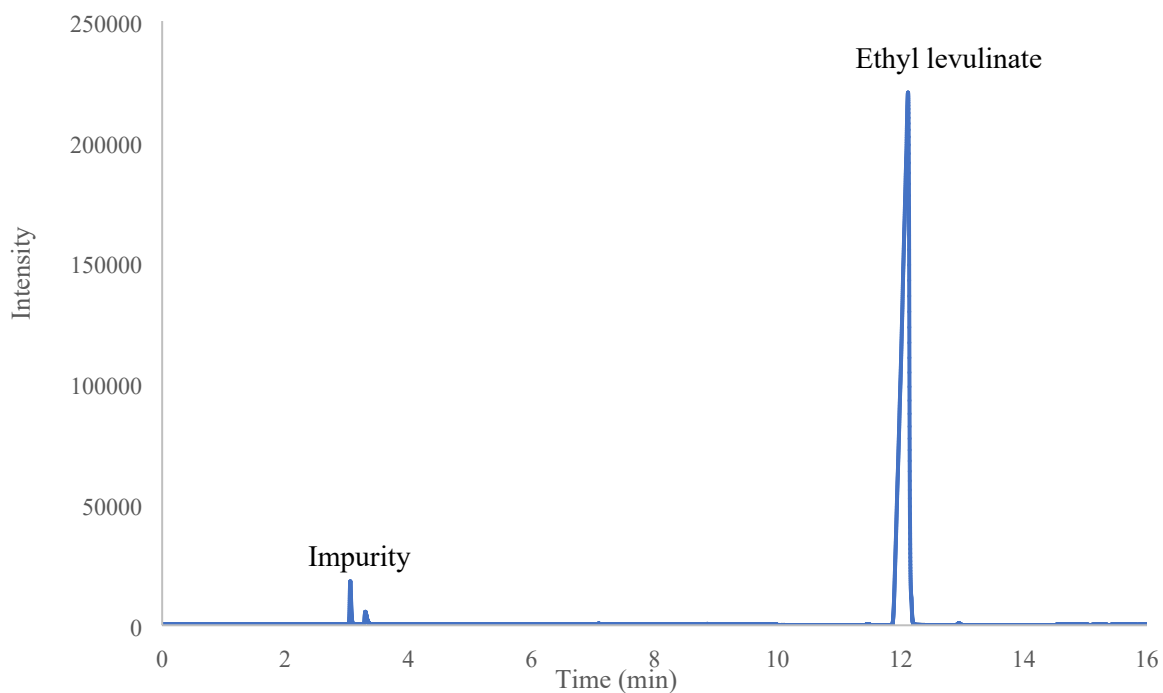

**Figure S5.** Chromatogram of the reaction product at 140 °C catalyzed with Zr+N-ie.

#### 4. TOF and kinetic fitting

**Table S1.** TOF for the esterification of LAc with ethanol at 140 °C.

| Catalyst | TOF (s <sup>-1</sup> ) |
|----------|------------------------|
| Nb-500   | 1.90x10 <sup>-3</sup>  |
| Nb+H-i   | 5.85x10 <sup>-3</sup>  |
| Nb+N-i   | 1.00x10 <sup>-2</sup>  |
| Nb+N-ie  | 1.34x10 <sup>-2</sup>  |
| Zr-500   | 1.28x10 <sup>-2</sup>  |
| Zr+H-i   | 1.86x10 <sup>-2</sup>  |
| Zr+N-i   | 1.96x10 <sup>-2</sup>  |
| Zr+N-ie  | 3.69x10 <sup>-2</sup>  |

**Table S2.** Power law kinetic model for the reactions in the absence of catalyst and catalyzed with Zr+N-ie and Nb+N-ie at 70 and 140 °C.

| Catalyst | T = 70 °C |          |          |          | T = 140 °C |          |          |           |
|----------|-----------|----------|----------|----------|------------|----------|----------|-----------|
|          | $\eta=0$  | $\eta=1$ | $\eta=2$ | $k_{70}$ | $\eta=0$   | $\eta=1$ | $\eta=2$ | $k_{140}$ |
| No Cat   | 0.949     | 0.992    | 0.955    | 3.16E-04 | 0.963      | 0.999    | 0.984    | 1.02E-03  |
| Nb+N-IE  | 0.861     | 0.896    | 0.992    | 7.69E-04 | 0.667      | 0.868    | 0.995    | 2.90E-03  |
| Zr+N-ie  | 0.924     | 0.935    | 0.995    | 3.95E-03 | 0.924      | 0.937    | 0.995    | 1.82E-01  |

**Table S3.** Benchmarking of sulfated zirconia- and niobia-based catalysts reported in the literature for the esterification of levulinic acid (LAc) with ethanol. The table summarizes sulfate precursor (S source), calcination

| Catalyst                                            | S source                       | Calcination treatment |       | Reaction operating conditions |                      |                  |                   | Levulinic acid conversion (%)                                                     | Reference |
|-----------------------------------------------------|--------------------------------|-----------------------|-------|-------------------------------|----------------------|------------------|-------------------|-----------------------------------------------------------------------------------|-----------|
|                                                     |                                | T (°C)                | t (h) | Catalyst load (%)*            | LAc/EtOH molar ratio | Temperature (°C) | Reaction time (h) |                                                                                   |           |
| SO <sub>4</sub> <sup>2-</sup> /Six-ZrO <sub>2</sub> | H <sub>2</sub> SO <sub>4</sub> | 600                   | 3     | 5                             | 1:10                 | 70               | 10                | 65                                                                                | 1         |
|                                                     |                                |                       |       | 10                            |                      |                  |                   | 76                                                                                |           |
| SO <sub>4</sub> <sup>2-</sup> /ZrO <sub>2</sub>     |                                | 600                   | 3     | 5                             | 1:10                 | 70               | 10                | 21                                                                                |           |
|                                                     |                                |                       |       | 10                            |                      |                  |                   | 26                                                                                |           |
| SO <sub>4</sub> <sup>2-</sup> /bulkZrO <sub>2</sub> | H <sub>2</sub> SO <sub>4</sub> | 500                   | 3     | 2.5                           | 1:5                  | 70               | 8                 | 62                                                                                | 2         |
|                                                     |                                |                       |       |                               |                      |                  |                   | SO <sub>4</sub> <sup>2-</sup> /ZrO <sub>2</sub> (100)                             |           |
| SO <sub>4</sub> <sup>2-</sup> /15ZrKI L-2           | H <sub>2</sub> SO <sub>4</sub> | 500                   | 3     | 2.5                           | 1:5                  | 70               | 5                 | 20                                                                                | 3         |
|                                                     |                                |                       |       |                               |                      | 100              |                   | 70                                                                                |           |
| Zir-5/1-C@SO <sub>4</sub> <sup>2-</sup>             | H <sub>2</sub> SO <sub>4</sub> | 500                   | 2     | 1.25                          | 1:5                  | 80               | 8                 | 95                                                                                | 4         |
| SO <sub>4</sub> /Nb <sub>2</sub> O <sub>5</sub>     | H <sub>2</sub> SO <sub>4</sub> | 550                   | 5     | 2.5                           | 1:5                  | 70               | 5                 | 14                                                                                | 5         |
|                                                     |                                |                       |       |                               |                      |                  |                   | SO <sub>4</sub> /ZrO <sub>2</sub> (NH <sub>4</sub> ) <sub>2</sub> SO <sub>4</sub> |           |

\* Catalyst load, mass percentage with respect to levulinic acid.

## References

- 1 Y. Kuwahara, W. Kaburagi, K. Nemoto and T. Fujitani, *Appl. Catal. A Gen.*, 2014, **476**, 186–196.
- 2 M. Popova, Á. Szegedi, H. Lazarova, M. Dimitrov, Y. Kalvachev, G. Atanasova, A. Ristić, N. Wilde, R. Gläser, *Reac. Kinet. Mech. Cat.*, 2017, **120**, 55-67.
- 3 M. Popova, Á. Szegedi, H. Lazarova, A. Ristić, Y. Kalvachev, G. Atanasova, N. Wilde, N. N. Tušar and R. Gläser, *Micropor. Mesopor. Mater.*, 2016, **235**, 50–58.
- 4 S. Lanaya, Y. El Jemli, K. Khallouk, K. Abdelouahdi, A. Hannioui, A. Solhy and A. Barakat, *ACS Omega*, 2022, **7**, 27839–27850.
- 5 D. R. Fernandes, A. S. Rocha, E. F. Mai, C. J. A. Mota and V. Teixeira da Silva, *Appl. Catal. A Gen.*, 2012, **425**, 199–204.
